# Supplementary material for: Intramolecular hydrogen bond assisted planarization and self-assembly of simple disc-shaped molecules in mesophasesElectronic supplementary information (ESI) available: synthetic procedures for compounds 1–3 and crystallographic details for 3. See http://www.rsc.org/suppdata/cc/b2/b201742c/
Source: Royal Society of Chemistry journal article supplement (doi:10.1039/b201742c), 2002-05-27
Supplement: b201742c.doc [file b201742c.doc]

**Title:** Intramolecular hydrogen bonds assisted planarization and columnar self-assembly of simple disc-shaped molecules

# Authors: Wenmiao Shu and Suresh Valiyaveettil

# Supplementary Material (ESI) for Chemical Communications

# This journal is © The Royal Society of Chemistry 2002

# Synthesis and characterization

All reagents were purchased from Aldrich, Fluka or Fisher, and were used without further purification. NMR spectra were recorded using a Bruker AC300 spectrometer operating at 300 MHz for 1H NMR and at 75.47 MHz for 13C NMR in various deuterated solvents. Chemical shifts were in parts per million (ppm) relative to solvent nuclei as an internal reference. The mass spectrometry and elemental analysis were used to further confirm the purity and structure of the synthesized molecules. All powder samples were preheated to 200 °C and cooled to room temperature to remove traces of solvents or moisture trapped inside the material. The polarized optical microscopy (POM) measurements were done using Zeiss Axiolab Pol microscope equipped with Linkam LTS 350 heating stage. The thermal stabilities of the polymers were investigated using a TA Instruments SDT 2960 Simultaneous DTA-TGA at a heating rate of 5 C/min and a nitrogen flow rate of 70 mL/min. Differential scanning calorimetry (DSC) measurements were done on TA Instruments 2920 Differential Scanning Calorimeter with a heating rate of 5 °C /min. This preheated sample placed on a platinum film was used for X-ray measurements. For high-temperature measurements, a Bruker D8 ADVANCE X-ray diffractometer (Cu-Ka radiation, 40 kV and 40 mA) equipped with an Anton Paar HTK 1200 high-temperature oven camera and a scintillation detector was used. The temperature was controlled within ± 0.5 °C. We collected X-ray diffraction data at 28 °C, 100 °C, 120 °C, 140 °C, 160 °C, 180 °C and 200 °C (isotropic). The data is given at the end of this document.

***Synthesis of Compound 1 and 2***

# Synthesis of 2-bromo-1-benzyloxybenzene (4)

2-Bromophenol (25 g, 145 mmol) was dissolved in ethanol (100 mL) at room temperature and stirred with anhydrous potassium carbonate (30 g, 217 mmol) under nitrogen at 60 °C. Benzyl bromide (37.1 g, 217 mmol) was added dropwise during a period of 10 min and the mixture was stirred at 60 °C for overnight. The solvent was removed under reduced pressure, followed by the addition of diethyl ether (500 mL) and the organic layer was washed with water (2 x 300 mL). The solvent was removed under reduced pressure to yield oil. To remove excess benzyl bromide, the mixture was refluxed with NaOH (5 g) solution in methanol (200 mL) and distilled water (200 mL). Solvent was removed and dissolved the resulting oil in diethyl ether (300 mL). The organic layer was washed with 10 % NaOH solution (2 x 200 mL) followed by water (200 mL), and brine solution (200 mL). The organic phase was dried over anhydrous magnesium sulphate (MgSO4), filtered and concentrated to yield 35.3 g (93 %) of compound 4. 1H NMR (300 MHz, CDCl3, *δ* ppm): 7.52 (d, *J* = 8.0 Hz, 1 H, Ar-*H*), 7.50-7.31 (m, 6 H, Ar-*H*), 7.21 (d, *J* =8.4 Hz, 1 H, Ar-*H*), 6.90 (t, *J* = 8.0 Hz, 1 H, Ar-*H*), 5.12 (s, 2 H, OC*H2*). 13C NMR (75.47 MHz, CDCl3, *δ* ppm): 133.7 (Ar-*C*), 128.9 (Ar-*C*), 128.7 (Ar-*C*), 128.2 (Ar-*C*), 128.0 (Ar-*C*), 127.9 (Ar-*C*), 127.3 (Ar-*C*), 122.5 (Ar-*C*), 114.2 (Ar-*C*), 112.8 (Ar-*C*), 71.0 (Ar-*C*H2). Elemental analysis (%) for C13H11BrO(263.1) calcd: C: 59.34, H: 4.21, Br: 30.37, found: C: 59.22, H: 4.34, Br: 30.10. MS (EI) m/z 262.8 [M]+

**Syntehsis of 2-benzyloxyphenylboronic acid (5)**

To a solution of 2-bromo-1-benzyloxybenzene (**4)** (10.0 g, 38.1 mmol) in freshly distilled THF (200 mL) at –78°C, 1.6 M n-butyl lithium (71.3 mL, 114.1 mmol) was added. After 1 hour, the solution was warmed to –10 °C and kept for 10 min, and cooled to –78 °C. Triisopropyl borate (28.9 g, 152.4 mmol) was slowly added into the mixture and warmed to room temperature overnight. Dilute HCl (50 mL, 1 M) was added and stirred for additional 1 hr. The organic layer was separated, washed with water, dried over anhydrous MgSO4 and filtered. The solvent was evaporated under vacuum. Flash column chromatography (silica gel, dichloromethane, Rf = 0.3) of the residue gave 5.4 g (63 %) of2-benzyloxyphenylboronic acid **5** as colorless crystals. 1H NMR H (DMSO-d6, 300 MHz, *δ* ppm): 7.72-7.41 (m, 6H, Ar-*H*), 7.01 (d, *J* = 7.8 Hz, 1H, Ar-*H*), 76.95 (t, *J* = 6.95 Hz, 1H, Ar-*H*), 6.10 (s, 2H, Ar-*H*), 5.17 (s, 2H, Ar-C*H2*). 13C NMR (CDCl3, 75.47 MHz, *δ* ppm): 163.6 (Ar-*C*), 138.1 (Ar-*C*), 136.5 (Ar-*C*), 132.6 (Ar-*C*), 129.6 (Ar-*C*), 129.0 (Ar-*C*), 128.8 (Ar-*C*), 121.8 (Ar-*C*), 112.8 (Ar-*C*), 70.6 (Ar-*C*H2). Elemental analysis (%) for C13H13BO3 (228.05) calcd: C: 68.47; H: 5.75; B: 4.74; found: C: 69.34, H: 6.08, B: 4.39

Synthesis of 2,4,6-tris(2-benzyloxyphenyl)-1,3,5-triazine (6)

2,4,6-Trichloro-1,3,5-triazine (542 mg, 2.94 mmol), 2-benzyloxyphenylboronic acid **5** (2 g, 8.817 mmol) and (PPh3)4Pd (25 mg, 0.02 mmol) were added to a heterogeneous mixture of toluene (35 mL) and an aqueous solution of 2M Na2CO3 (30 mL, 60 mmol). The mixture was stirred and refluxed under argon atmosphere for 72 hrs. After cooling to room temperature, the organic layer was separated and the aqueous solution was extracted with toluene (2 x 30 mL). The combined organic solutions were dried over anhydrous magnesium sulphate, filtered and the solvent was removed under reduced pressure. Recrystallization of the residue from hexane afforded 210 mg (yield 11 %) of the pure product **6** as bright yellow crystals. M.p.: 175-177 oC 1H NMR H (CDCl3, 300 MHz, *δ* ppm): 8.54 (d, *J* = 8.2 Hz, 3H, Ar-*H*), 7.61 (t, *J =* 7.5 Hz, 3H, Ar-*H*), 7.49--7.05 (m, 21H, Ar-*H*), 5.01 (s, 6H, Ar-C*H2*). 13C NMR (CDCl3, 75.47 MHz, *δ* ppm): 173.1 (Ar-*C*), 167.1 (Ar-*C*), 141.5 (Ar-*C*), 132.0 (Ar-*C*), 127.1 (Ar-*C*), 124.9 (Ar-*C*), 122.9 (Ar-*C*), 122.8 (Ar-*C*), 121.4 (Ar-*C*), 120.8 (Ar-*C*), 115.8 (Ar-*C*), 71.0 (Ar-*C*H2). Elemental analysis (%) for C42H33N3O3 (627.7): calcd: C: 80.36; H: 5.30; N: 6.69; found: C: 80.13; H: 5.56; N: 6.42. MS (ESI) m/z: 650.3 [M + Na]+

Synthesis of 2,4,6-tris(2-hydroxyphenyl)-1,3,5-triazine (1)

2,4,6-Tris(2-benzyloxyphenyl)-1,3,5-triazine **6** (138 mg, 0.22 mmol) was dissolved in ethyl acetate (100 mL) and stirred with a suspension of palladium (10 %) on activated carbon (30 mg). The solution was purged with argon gas for three times and stirred for overnight under hydrogen atmosphere at room temperature. The solvent was evaporated under reduced pressure and the residue was recrystallized from hexane to afford 74 mg (95 %) of pure product **1** as yellow crystals. M.p.: 312-318 °C, 1H NMR (CDCl3, 300 MHz, *δ* ppm): 12.58 (s, 3H, Ar-O*H*), 8.44 (d, *J* = 8.25 Hz, 3H, Ar-*H*), 7.56 (t, *J =* 7.44 Hz, 3H, Ar-*H*HH), 7.08-7.05 (m, 6H, Ar-*H*). 13C NMR (CDCl3, 75.47 MHz, *δ* ppm): 174.4 (N-*C*), 166.1 (Ar-*C*), 140.5 (Ar-*C*), 135.0 (Ar-*C*), 124.6 (Ar-*C*), 123.4 (Ar-*C*), 122.7 (Ar-*C*). Elemental analysis (%) for C21H15N3O3 (357.4): calcd: C: 70.58; H: 4.23; N: 11.76; found: C: 70.29; H: 4.15; N: 11.53. MS (ESI) m/z: 357.8 [M+H]+

Synthesis of 3,4-bisdecyloxybenzaldehyde (7)

1-Bromodecane (72.0 g, 327 mmol) was added drop-wise to a mixture of 3,4- dihydroxybenzaldehyde (15.0 g, 109 mmol), anhydrous potassium carbonate (45.1 g, 327 mmol), 18-6 crown ether (5 mg) and MEK (300 mL). The resultant mixture was heated under reflux for 72 hrs. The solvent was removed under reduced pressure and dichloromethane was added to the residue and filtered. The filtrate was washed with dilute hydrochloric acid (200 mL, 1M), followed by aqueous sodium bicarbonate (150 mL, 1 M) and water (250 mL) and dried over magnesium sulfate. The solvent was removed under reduced pressure and the residue was recrystallized from ethanol to give 31.9 g (70 %) of compound **7** as light yellow solids. M.p.: 62-66 °C, 1H NMR (CDCl3, 300 MHz, *δ* ppm): 9.65 (s, 1H, Ar-*H*), 7.45-7.38 (m, 2H, Ar-*H*), 6.9 (d, *J* = 8.1Hz, 1H, Ar-*H*), 4.05-3.95 (m, 4H, Ar-OC*H2*), 1.81-1.60 (m, 4H, Ar-OCH2C*H2*), 1.47-1.28 (m, 32H, (C*H2*)8), 0.89-0.78 (m, 6H, C*H3*). 13C NMR (CDCl3, 75 MHz, *δ* ppm): 191.1 (*C=O*), 154.7 (Ar-*C*), 149.5 (Ar-*C*), 129.9 (Ar-*C*), 126.5 (Ar-*C*), 111.8 (Ar-*C*), 111.0 (Ar-*C*), 69.1 (O*C*H2), 31.8 (*C*H2), 29.5 (*C*H2), 29.2 (*C*H2), 29.0 (*C*H2), 28.9 (*C*H2), 25.9 (*C*H2), 25.8 (*C*H2), 22.6 (*C*H2), 14.0 (*C*H3). Elemental analysis (%) for C27H46O3 (418.7): calcd: C: 77.46; H: 11.07; found: C: 77.59; H: 11.38 MS (ESI) m/z: 419.2 [M+H]+

Synthesis of 3,4-bisdecyloxyphenol (8)

Conc. H2SO4 (5.0 g, 51 mmol) and 30 % H2O2 (10.0 g, 88 mmol) in methanol (10 mL) were added dropwise to a suspension of 3,4-bisdecyloxybenzaldehyde **7** (5.2 g, 12.5 mmol) in methanol (125 mL) at 15 °C. The reaction mixture was stirred for 8 hours at 25°C. The solvent was evaporated and mixture was poured into diethyl ether (200 mL), extracted with saturated sodium bicarbonate solution (100 mL), water (100 mL), and brine (100 mL). The solvent was evaporated to yield crude product, which was recrystallized from hexane (yield 3.86 g, 76 %) to get a light yellow solid. M.p.: 78-79 °C. 1H NMR (CDCl3, 300 MHz, *δ* ppm): 7.26 (s, 1H, Ar-*H*), 6.77 (d, *J* = 8.4 Hz, 1H, Ar-*H*), 6.44 (d, *J* = 2.79 Hz, 1H, Ar-*H*), 6.31 (AX, *J* =8.4 Hz, BX, *J* = 2.79 Hz, 1H, Ar-*H*), 3.96-3.88 (m, 4H, Ar-OC*H2*), 1.83-1.71 (m, 4H, Ar-OCH2C*H2*), 1.47-1.28 (m, 32H, (C*H2*)8), 0.88-0.79 (m, 6H, C*H3*) 13C NMR (CDCl3, 75.47 MHz, *δ* ppm): 150.5 (Ar-*C*), 150.3 (Ar-*C*), 143.1 (Ar-*C*), 116.4 (Ar-*C*), 106.0 (Ar-*C*), 102.3 (Ar-*C*), 70.7 (O*C*H2), 68.9 (O*C*H2), 31.8 (*C*H2), 29.5 (*C*H2), 29.4 (*C*H2), 29.35 (*C*H2), 29.3 (*C*H2), 29.3 (*C*H2), 29.1 (*C*H2), 25.9 (*C*H2), 22.6 (*C*H2), 13.9 (*C*H3). Elemental analysis (%) for C26H46O3 (406.6): calcd: C: 76.79; H: 11.40; found: C: 76.70 H: 11.58 MS (ESI) m/z: 407.1 [M+H]+, 429.1 [M + Na]+.

Synthesis of 2-bromo-4,5-bis(decyloxyphenol) (9)

Bromine (0.60mL, 12.3 mmol) in dichloromethane (10 mL) was added dropwise to 3,4-bis(decyloxyphenol) (**8)** (5.0 g, 12.3 mmol) in dichloromethane (200 mL) at 0 °C. The progress of the reaction was monitored by TLC. After the reaction was completed, 100 mL of ice-cooled water was added to the mixture and extracted with water (100 mL x 2). The organic layer was dried over magnesium sulphate. Chromatographic separation through silica gel with hexane/dichloromethane/methanol = 1:2:0.02 (Rf = 0.61) gave 5.68 g (95 %) of light violet solid (**9**). M.p.: 44-48 °C. 1H NMR (CDCl3, 300 MHz, ** ppm): 6.94 (s, 1H, Ar-*H*), 6.60 (s, 1H, Ar-*H*), 5.10 (s, 1H, Ar-O*H*), 3.99-3.85 (m, 4H, Ar-OC*H2*), 1.83-1.69 (m, 4H, Ar-OCH2C*H2*), 1.48-1.28 (m, 32H, (C*H2*)8), 0.89-0.78 (m, 6H, C*H3*). 13C NMR (CDCl3, 75.47 MHz, *δ* ppm): 150.3 (Ar-*C*), 146.9 (Ar-*C*), 143.4 (Ar-*C*), 117.9 (Ar-*C*), 101.9 (Ar-*C*), 98.5 (Ar-*C*), 70.7 (O*C*H2), 69.1 (O*C*H2), 31.8 (*C*H2), 29.5 (*C*H2), 29.4 (*C*H2), 29.3 (*C*H2), 29.26 (*C*H2), 29.23 (*C*H2), 25.9 (*C*H2), 22.58 (*C*H2), 13.9 (*C*H3). Elemental analysis (%) for C26H45BrO3 (484.3): calcd: C: 64.32; H: 9.34; Br: 16.46; found: C: 64.01 H: 9.61 Br: 16.26 MS (ESI) m/z: 483.2 [M-H]+

Synthesis of 1-bromo-2-benzyloxy-4,5-bisdecyloxybenzene (10)

Benzyl bromide (2.47 g, 14.4 mmol) was added to a mixture of 2-bromo-4,5-bisdecyloxyphenol (**9)** (3.5 g, 7.2 mmol) and anhydrous potassium carbonate (2.0 g, 14.5 mmol) in ethanol (200 mL). The mixture was refluxed for overnight, the excess solvent was removed under reduced pressure, dichloromethane (150 mL) was added to the residue and filtered. The filtrate was washed with dilute hydrochloric acid (100 mL, 1M), aqueous sodium bicarbonate (50 mL, 1 M) followed by water (150 mL), dried over magnesium sulfate and filtered. The solvent was removed under reduced pressure and the residue was recrystallized from methanol to yield 3.5 g (85 %) of the pure product as white solid **10**. M.p.: 47-49 °C. 1H NMR (CDCl3, 300 MHz,  ppm): 7.49-7.30 (m, 5H, Ar-*H*), 7.06 (s, 1H, Ar-*H*), 7.56 (s, 1H, Ar-*H*), 5.07 (s, 2H, Ar-C*H2*), 3.91-3.87 (m, 4H, Ar-OC*H2*), 1.77-1.32 (m, 36H, (C*H2*)9), 0.89-0.76 (m, 6H, C*H3*); 13C NMR (CDCl3, 75.47 MHz, *δ* ppm): 149.4 (Ar-*C*), 149.1 (Ar-*C*), 144.4 (Ar-*C*), 136.7 (Ar-*C*), 128.4 (Ar-*C*), 127.9 (Ar-*C*), 127.3 (Ar-*C*), 119.2 (Ar-*C*), 103.7 (Ar-*C*), 102.6 (Ar-*C*), 72.3 (O*C*H2), 70.3 (O*C*H2), 69.6 (O*C*H2), 31.8 (*C*H2), 29.5 (*C*H2), 29.48 (*C*H2), 29.3 (*C*H2), 29.1 (*C*H2), 25.9 (*C*H2), 22.6 (*C*H2), 14.0 (*C*H3). Elemental analysis (%) for C33H51BrO3 (575.7): calcd: C, 68.85; H, 8.93; Br, 13.88; found: C: 68.52 H: 8.81 Br: 14.03 MS (EI) m/z: 575.2 [M+]

Synthesis of 2-benzyloxy-4,5-bisdecyloxyphenylboronic acid (11)

To a solution of 1-bromo-2-benzyloxy-4,5-bisdecyloxybenzene (**10**) (4.0 g, 7.1 mmol) in freshly distilled THF (100 mL) at – 78°C, 1.6 M n-butyl lithium (34.1 mL, 89.2 mmol) was added. After 1 hour, the solution was warmed to – 10 °C for 10 min, and then cooled to – 78 °C. Triisopropyl borate (5.4 g, 28.5 mmol) was slowly added into the solution. The reaction mixture was allowed to warm up to room temperature, dilute HCl (50 mL, 1 M) was added and kept stirring for additional 1 hr. The organic layer was separated, washed with water and dried over MgSO4. The solvent was removed under reduced pressure and the residue was purified using flash column chromatography (silica gel, dichloromethane, Rf = 0.52) to give 0.84 g (22 %) of **11** as a white solid. M.p.: 90-93 oC. 1H NMR (CDCl3, 300 MHz,  ppm): 7.50-7.30 (m, 6H, Ar-*H*), 6.56 (s, 1H, Ar-*H*), 5.82 (s, 2H, Ar-C*H2*), 5.09 (s, 2H, Ar-C*H2*), 4.00-3.96 (m, 4H, Ar-OC*H2*), 1.84-1.73 (m, 4H, OCH2C*H2*), 1.60-1.20 (m, 28H, (C*H2*)8), 0.91-0.86 (m, 6H, C*H3*). 13C NMR (CDCl3, 75.47 MHz,  ppm): 159.2 (Ar-*C*), 152.8 (Ar-*C*), 143.5 (Ar-*C*), 136.0 (Ar-*C*), 128.8 (Ar-*C*), 128.4 (Ar-*C*), 127.7 (Ar-*C*), 121.7 (Ar-*C*), 99.3 (Ar-*C*), 71.4 (O*C*H2), 70.1 (O*C*H2), 69.1 (O*C*H2), 31.8 (*C*H2), 29.6 (*C*H2), 29.5 (*C*H2), 29.48 (*C*H2), 29.4 (*C*H2), 29.3 (*C*H2), 29.29 (*C*H2), 29.2 (*C*H2), 29.0 (*C*H2), 25.9 (*C*H2), 25.8 (*C*H2), 22.5 (*C*H2), 14.0 (*C*H3). Elemental analysis (%) for C33H53BO5 (540.6): calcd: C: 73.32, H: 9.88, B: 2.00; found: C: 73.01, H: 9.56, B: 2.37 MS (ESI) m/z: 563.4 [M + Na]+

**Synthesis of 2,4,6-tris(2-benzyloxy-4,5-bisdecyloxyphenyl)-1,3,5-triazine (12)**

2,4,6-Trichloro-1,3,5-triazine (33 mg, 0.18 mmol), 2-benzyloxy-4,5-bisdecyloxyphenylboronic acid (**11**) (0.84 g, 0.54 mmol) and a catalytic amount of (PPh3)4Pd (5 mg, 0.004 mmol) were added to a heterogeneous mixture of toluene (12 mL) and an aqueous solution of 2M Na2CO3 (8 mL, 16 mmol). The mixture was stirred and refluxed under argon atmosphere for 72 hrs. After cooling to room temperature, the organic layer was separated and the aqueous solution was extracted with toluene (2 x 10 mL). The combined organic solutions were dried over magnesium sulphate and the solvent was removed under reduced pressure. Column chromatography (silica gel, hexane: ethyl acetate = 15:1 Rf = 0.5) of the crude product yielded 71 mg (8.8 %) of **12** as a bright yellow solid. 1H NMR (CDCl3, 300 MHz,  ppm): 7.78 (s, 3H, Ar-*H*), 7.42 (d, *J* = 6.84 Hz, 6H, Ar-*H*), 7.15-7.02 (m, 9H, Ar-*H*), 6.63 (s, 3H, Ar-*H*), 5.13 (s, 6H, OC*H2*), 4.03 (t, *J* = 6.4, 6H, Ar-OC*H2*), 3.86 (t, *J* = 6.8 Hz, 6H, Ar-OC*H2*), 1.80-1.25 (m, 114H, (C*H2*)8), 0.89-0.86 (m, 18H, C*H3*) 13C NMR (CDCl3, 75.47 MHz,  ppm): 171.7(N-*C*), 153.5 (Ar-*C*), 152.4 (Ar-*C*), 143.6 (Ar-*C*), 137.3 (Ar-*C*), 128.1 (Ar-*C*), 127.3 (Ar-*C*), 126.9 (Ar-*C*), 119.8 (Ar-*C*), 117.9 (Ar-*C*), 102.8 (Ar-*C*), 72.3 (O*C*H2), 69.8 (O*C*H2), 69.3 (O*C*H2), 31.8 (*C*H2), 29.54 (*C*H2), 29.51 (*C*H2), 29.4 (*C*H2), 29.3 (*C*H2), 29.1 (*C*H2), 25.9 (*C*H2), 22.6 (*C*H2), 13.9 (*C*H3). MS (ESI) m/z: 1565.3 [M + H] + HRMS (calcd. for CHON): C 102 H 153 O 9 N 3, R+D= 2.0 ‰ (expected C 102, H 153, O 9, N 3)

**Synthesis of 2,4,6-tris(2-hydroxy-4,5-bisdecyloxyphenyl)-1,3,5-triazine (2)**

2,4,6-Tris(2-benzyloxy-4,5-didecyloxyphenyl)-1,3,5-triazine **12** (30 mg, 0.019 mmol) was dissolved in ethyl acetate (20 mL) and stirred with a suspension of Pd on activated carbon (10 mg). The solution was purged with argon gas for three times and stirred overnight under hydrogen atmosphere at room temperature. The solvent was removed under reduced pressure. Column chromatography (silica gel, hexane: dichloromethane (4:1), Rf = 0.6) of the residue yielded 24 mg (96 %) of compound **2** as a yellow solid. 1H NMR (CDCl3, 300 MHz,  ppm): 13.25 (s, 3H, Ar-O*H*), 7.52 (s, 3H, Ar-*H*), 6.53 (s, 3H, Ar-*H*), 4.09-4.00 (m, 12H, Ar-OC*H2*), 1.89-1.20 (m, 96H, (C*H2*)8), 0.88-0.86 (m, 18H, C*H3*). 13C NMR (CDCl3, 75.47 MHz,  ppm): 168.2 (N-*C*), 159.9 (Ar-*C*), 156.9 (Ar-*C*), 142.7 (Ar-*C*), 112.0 (Ar-*C*), 106.9 (Ar-*C*), 101.8 (Ar-*C*), 70.1 (O*C*H2), 69.0 (O*C*H2), 31.9 (*C*H2), 31.9 (*C*H2), 29.7 (*C*H2), 29.6 (*C*H2), 29.5 (*C*H2), 29.4 (*C*H2), 29.3 (*C*H2), 28.8 (*C*H2), 26.0 (*C*H2), 25.9 (*C*H2), 22.6 (*C*H2), 14.0 (*C*H3). MS (ESI) m/z: 1295.8 [M+H]+, HRMS (calcd. for CHON): C 81, H 136, O 9, N 3, R+D= -1.4 ‰ (expected C 81, H 136, O 9, N 3);Elemental analysis (%) for C81H97N3O9 (1295.0): calcd: C: 73.13 H: 10.51 N: 3.24; found: C: 72.91 H: 10.29 N: 2.96

# Synthesis of model compound 3

## Synthesis of 2,5-dibromo-1,4-dihydroxybenzene (13)

Bromine (24.8 mL, 453 mmol) was added dropwise to a solution of hydroquinone (20 g, 181 mmol) in acetic acid (200 mL) at room temperature. The reaction mixture was stirred overnight, and concentrated to get a white solid, which was recrystallized from 100 mL acetic acid to yield 36.4 g (75 %) of the product **13**. 1H NMR (DMSO-d6, 300 MHz, *δ* ppm): 9.79 (s, 2H, Ar-O*H*), 7.05 (s, 2H, Ar-*H*). 13C NMR (DMSO-d6, 75.47 MHz, *δ* ppm): 147.2 (Ar-*C*), 119.4 (Ar-*C*), 108.2 (Ar-*C*). MS (EI): m/z 267.8 [M] +

Synthesis of 2,5-dibromo-1,4-dibenzyloxybenzene (14)

Benzyl bromide (36.5 g, 139 mmol) was added dropwise to the mixture of anhydrous K2CO3 (19.39 g, 139 mmol) and 2,5-dibromo-1,4-dihydroxybenzene (**13**) (10 g, 34.7 mmol) in ethanol (100 mL) at 60 °C. The mixture was kept stirring for overnight. The resultant mixture was then cooled and the solvent was evaporated under reduced pressure. White solid precipitated from methanol (200 mL) at 0 °C was filtered and washed with distilled water to obtain a solid, which was dried in vacuum to yield 14.0 g (90 %) of 2,5-dibromo-1,4-dibenzyloxybenzene (**14**). 1H NMR (DMSO-d6, 300 MHz, *δ* ppm): 7.40-7.28 (m, 12 H, Ar-H), 5.12 (s, 4 H, OC*H2*). 13C NMR (DMSO-d6, CDCl3, 75.47 MHz, *δ* ppm): 149.2 (Ar-*C*), 136.1 (Ar-*C*), 128.2 (Ar-*C*), 127.7 (Ar-*C*), 127.1 (Ar-*C*), 118.6 (Ar-*C*), 110.7 (Ar-*C*), 71.0 (Ar-*C*H2). Elemental analysis (%) for C20H16Br2O2 (448.2), calcd: C: 53.60, H: 3.6, Br: 35.66, found: C: 53.39, H: 3.61, Br: 35.44, MS (EI) m/z: 447.9 [M]+

Synthesis of 1,4-dibenzyloxyphenyl-2,5-diboronic acid (15)

To the solution of 2,5-dibromo-1,4-dibenzyloxybenzene **(14)** (10 g, 22.3 mmol) in freshly distilled THF (200 mL) at – 78 °C, 55.8 mL (89.2 mmol) of 1.6 M solution of n-butyl lithium in hexane was added. After 1 hour, the solution was warmed to –10 °C for 10 mins and cooled to –78 °C. Triisopropyl borate (41.9 g, 223 mmol) was slowly added into the solution. The reaction mixture was allowed to warm up to room temperature, diluted with water (150 mL) and stirred for another 24 hrs. The organic layer was separated, dried over anhydrous MgSO4 and filtered. The solvent was removed under reduced pressure and the residue was recrystallized from acetone to yield 1.7 g (21 %) of the pure product **15**. M.p.: 178-180 °C. 1H NMR (DMSO-d6, 300 MHz, *δ* ppm): 7.82 (s, 2 H, Ar-*H*), 7.48-7.29 (m, 10 H, Ar-*H*), 5.13 (s, 4 H, OC*H2*). 13C NMR (DMSO-d6, 75.47 MHz, *δ* ppm): 156.6 (Ar-*C*), 137.2 (Ar-*C*), 128.4 (Ar-*C*), 128.3 (Ar-*C*), 127.8 (Ar-*C*), 127.7 (Ar-*C*), 118.3 (Ar-*C*), 70.2 (Ar-*C*H2). Elemental analysis (%) C20H20B2O6 (377.99) calcd. C: 63.55; H: 5.33; B: 5.72; found. C: 65.53; H: 5.96; B: 5.02 for MS (ESI):m/z 379.5 [M + H]+

Synthesis of 2,5-bis(2-pyridyl)-1,4-dibenzyloxybenzene (16)

To a 1:3 mixture of 1,4-dibenzyloxyphenyl-2,5-diboronic acid (15) and 2-bromopyridine and catalytic amount (1.0 mol %) of tetrakis(triphenylphospine) palladium [Pd(PPh3)4], was added a degassed mixture of toluene (50 ml) and 2M sodium carbonate solution (50 ml). The mixture was vigorously stirred at 85-90 °C for 3 days under argon atmosphere, cooled to room temperature and diluted with 30 mL toluene. The layers were separated and aqueous layer was extracted with toluene (2 x 30 mL). The combined organic layer was washed with water (50 mL) and brine (50 mL). The solvent was evaporated and the residue was washed with methanol. Recrystallization of the residue from toluene yielded compound 16 (61 %). M.p.: 200-204 °C. 1H NMR (DMSO-d6, 300 MHz, *δ* ppm): 8.80 (d, *J* = 4.8 Hz, 2 H, Ar-*H*), 8.12-8.05 (m, 4 H, Ar-*H*), 7.71 (s, 2 H, Ar-*H*), 7.55 - 7.30 (m, 12 H, Ar-*H*). 13C NMR (DMSO-d6, 75.47 MHz, *δ* ppm): 154.4 (Ar-*C*), 150.1 (Ar-*C*), 149.3 (Ar-*C*), 137.0 (Ar-*C*), 135.9 (Ar-*C*), 129.8 (Ar-*C*), 128.3 (Ar-*C*), 127.6 (Ar-*C*), 127.3 (Ar-*C*), 124.9 (Ar-*C*), 122.3 (Ar-*C*), 116.0 (Ar-*C*), 71.0 (Ar-*C*H2). Elemental analysis (%) for C30H24N2O2 (444.5): calcd: C 81.06; H 5.44; N 6.30 found: C 80.97; H 5.68, N 6.05 MS (ESI): m/z 445.2 [M + H] +

Synthesis of 2,5-bis(2-pyridyl)-1,4-hydroquinone (3)

2,5-bis(2-pyridyl)-1,4-dibenzyloxybenzene (16) (300 mg, 0.68 mmol) was dissolved in THF (50 mL) and stirred with Pd (10 %) on activated carbon (1.0 g). The solution was purged with argon gas for three times, and stirred overnight under hydrogen atmosphere for overnight at room temperature. The solvent was removed under reduced pressure to obtain 160 mg (yield 90 %) of compound 3. The single crystals were obtained by the slow evaporation of yellowish solid in toluene. M.p.: 280 - 283 °C. 1H NMR (DMSO-d6, 300 MHz, *δ* ppm): 13.38 (s, 2H, Ar-O*H*), 8.66 (d, *J* = 5.0 Hz, 2H, Ar-*H*), 8.26 (d, *J* = 8.2 Hz, 2H, Ar-*H*), 8.03 (t, *J* = 8.2 Hz, 2 H, Ar-*H*), 7.58 (s, 2H, Ar-*H*), 7.47 (t, *J* = 6.6 Hz, 2H, Ar-*H*). 13C NMR (DMSO-d6, 75.47 MHz, *δ* ppm): 156.0 (Ar-*C*), 151.1 (Ar-*C*), 146.5 (Ar-*C*), 138.6 (Ar-*C*), 122.7 (Ar-*C*), 121.5 (Ar-*C*), 120.5 (Ar-*C*), 114.8 (Ar-*C*). Elemental analysis (%) for C16H12N2O2 (264.3): calcd: C 72.72; H 4.58; N 10.60; found: C 72.52; H 4.46; N 10.39. MS (EI): m/z 264.3 [M]+

## X-Ray Structure Determination

The light yellow single crystals of compound **3** were obtained from the slow evaporation of toluene solution, mounted at the end of the fibre and cooled to – 50 oC for data collection. The diffraction experiments were carried out on a Bruker SMART CCD diffractometer with a Mo-Kα sealed tube. The software SMART was used for collection of data frames, indexing reflections and determination of lattice parameters, SAINT for integration of intensity of reflections and scaling, SADABS for absorption correction and SHELXTL for space group and structure determination, refinement of graphics and structure reporting.

# Crystallographic Data for compound 3

Table 1. Crystal data and structure refinement for compound 3.

Identification code 120

Empirical formula C16 H12 N2 O2

Formula weight 264.28

Temperature 223(2) K

Wavelength 0.71073 Å

Crystal system Monoclinic

Space group P2(1)/n

Unit cell dimensions a = 6.0888(4) Å = 90°.

b = 5.6584(4) Å = 90.604(2)°.

c = 17.9235(12) Å  = 90°.

Volume 617.48(7) Å3

Z 2

Density (calculated) 1.421 g/cm3

Absorption coefficient 0.096 mm-1

F(000) 276

Crystal size 0.30 x 0.22 x 0.12 mm3

Theta range for data collection 2.27 to 24.99°.

Index ranges -7<=h<=5, -6<=k<=6, -17<=l<=21

Reflections collected 2979

Independent reflections 1083 [R(int) = 0.0545]

Completeness to theta = 24.99° 99.4 %

Absorption correction Sadabs (Sheldrick, 1996)

Max. and min. transmission 0.9363 and 0.1282

Refinement method Full-matrix least-squares on F2

Data / restraints / parameters 1083 / 0 / 116

Goodness-of-fit on F2 1.003

Final R indices [I>2sigma(I)] R1 = 0.0433, wR2 = 0.1148

R indices (all data) R1 = 0.0523, wR2 = 0.1216

Extinction coefficient 0.041(11)

Largest diff. peak and hole 0.198 and -0.171 e.Å-3

Table 2. Atomic coordinates ( x 104) and equivalent isotropic displacement parameters (Å2x 103)

for 120. U(eq) is defined as one third of the trace of the orthogonalized Uij tensor.

________________________________________________________________________________

x y z U(eq)

________________________________________________________________________________

O(1) 8382(2) 8942(2) 983(1) 50(1)

N(1) 5986(2) 5680(2) 1535(1) 43(1)

C(1) 5793(3) 3872(3) 2009(1) 49(1)

C(2) 4024(3) 2371(3) 2012(1) 47(1)

C(3) 2355(3) 2757(3) 1497(1) 45(1)

C(4) 2525(2) 4622(3) 1006(1) 40(1)

C(5) 4360(2) 6086(2) 1027(1) 34(1)

C(6) 4702(2) 8092(2) 508(1) 32(1)

C(7) 6662(2) 9417(2) 507(1) 35(1)

C(8) 6925(2) 11262(3) 11(1) 36(1)

________________________________________________________________________________

Table 3. Bond lengths [Å] and angles [°] for 120.

_____________________________________________________

O(1)-C(7) 1.3708(17)

N(1)-C(1) 1.336(2)

N(1)-C(5) 1.3570(18)

C(1)-C(2) 1.372(2)

C(2)-C(3) 1.383(2)

C(3)-C(4) 1.379(2)

C(4)-C(5) 1.391(2)

C(5)-C(6) 1.4847(19)

C(6)-C(8)#1 1.400(2)

C(6)-C(7) 1.409(2)

C(7)-C(8) 1.382(2)

C(8)-C(6)#1 1.400(2)

C(1)-N(1)-C(5) 119.19(13)

N(1)-C(1)-C(2) 123.41(15)

C(1)-C(2)-C(3) 118.12(15)

C(4)-C(3)-C(2) 119.17(15)

C(3)-C(4)-C(5) 120.24(14)

N(1)-C(5)-C(4) 119.87(13)

N(1)-C(5)-C(6) 116.34(12)

C(4)-C(5)-C(6) 123.78(13)

C(8)#1-C(6)-C(7) 117.00(13)

C(8)#1-C(6)-C(5) 120.87(13)

C(7)-C(6)-C(5) 122.13(13)

O(1)-C(7)-C(8) 117.11(12)

O(1)-C(7)-C(6) 122.47(13)

C(8)-C(7)-C(6) 120.41(13)

C(7)-C(8)-C(6)#1 122.59(13)

___________________________________________

Symmetry transformations used to generate equivalent atoms: #1 -x+1,-y+2,-z

Table 4. Anisotropic displacement parameters (Å2x 103) for 120. The anisotropic

displacement factor exponent takes the form: -22[ h2 a*2U11 + ... + 2 h k a* b* U12 ]

______________________________________________________________________________

U11 U22 U33 U23 U13 U12

______________________________________________________________________________

O(1) 33(1) 67(1) 50(1) 17(1) -13(1) -13(1)

N(1) 42(1) 50(1) 36(1) 4(1) -7(1) -7(1)

C(1) 52(1) 52(1) 42(1) 8(1) -8(1) -5(1)

C(2) 57(1) 42(1) 43(1) 5(1) 6(1) -3(1)

C(3) 44(1) 43(1) 48(1) -4(1) 7(1) -10(1)

C(4) 37(1) 45(1) 38(1) -2(1) 1(1) -6(1)

C(5) 33(1) 40(1) 28(1) -6(1) 3(1) -2(1)

C(6) 30(1) 38(1) 28(1) -5(1) 3(1) -3(1)

C(7) 27(1) 46(1) 31(1) -2(1) -2(1) -2(1)

C(8) 27(1) 48(1) 34(1) -2(1) -2(1) -8(1)

______________________________________________________________________________

Table 5. Hydrogen coordinates ( x 104) and isotropic displacement parameters (Å2x 10 3) for 120.

________________________________________________________________________________

x y z U(eq)

________________________________________________________________________________

H(1) 7850(40) 7630(40) 1275(11) 75(6)

H(1A) 7080(30) 3610(30) 2324(10) 61(5)

H(3) 4000(30) 1100(30) 2360(10) 55(5)

H(3) 1060(30) 1750(30) 1458(7) 45(4)

H(4) 1340(30) 4890(30) 665(10) 58(5)

H(8) 8350(30) 12130(30) 33(8) 40(4)

________________________________________________________________________________

Hydrogen bonds with H..A < r(A) + 2.000 Angstroms and <DHA > 110 deg.

D-H d(D-H) d(H..A) <DHA d(D..A) A

O1-H1 0.963 1.658 154.09 2.558 N1


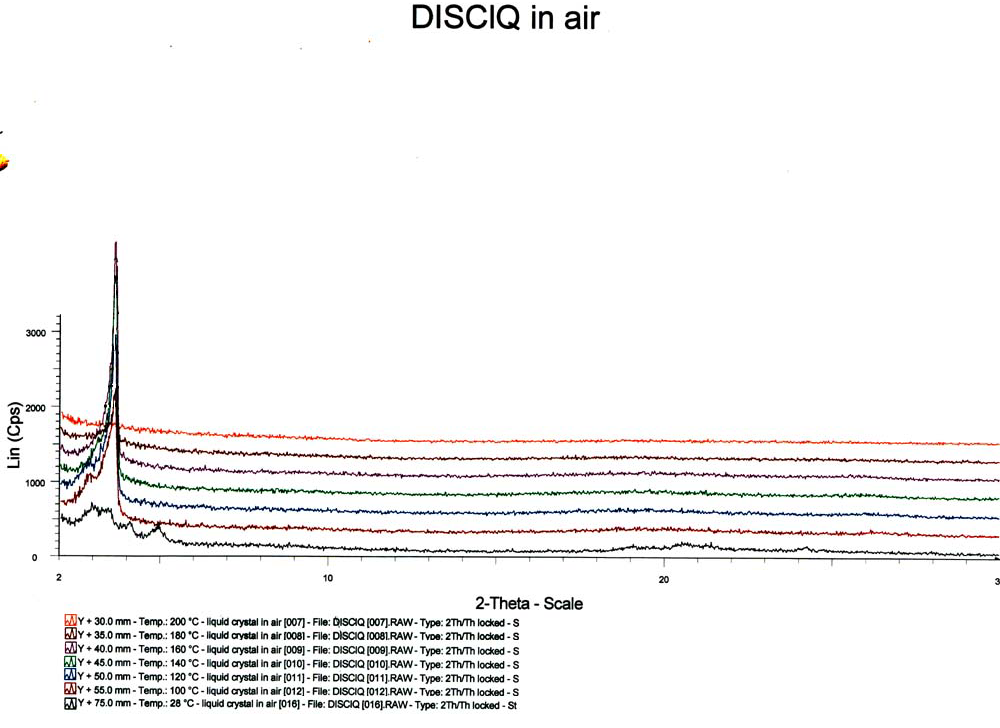


X-ray diffraction patters of compound 3 at variable temperature starting form 28 °C to 2000 °C.
